# Supplementary material for: Could Children’s Myopization Have Been Avoided during the Pandemic Confinement? The Conjunctival Ultraviolet Autofluorescence (CUVAF) Biomarker as an Answer
Source: MDPI journal article supplement (doi:10.3390/biomedicines12020347), 2024-02-01
Supplement: s1 [file s1]

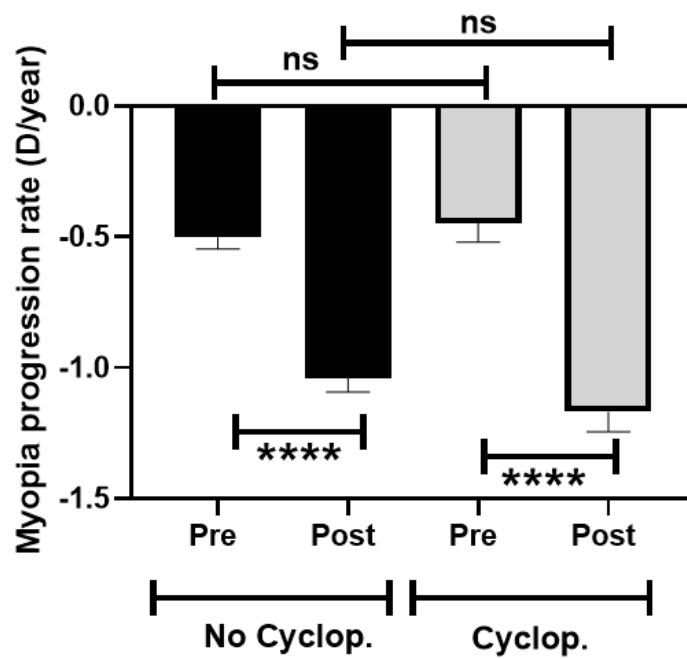

**Figure S1.** Cycloplegia analysis. Myopia progression rate in children measured with (clinic patients, n=63) and without cycloplegia (optical shops, n=139). ns: non-significant. Significance  $p < 0.05$ . \*\*\*\*  $p < 0.0001$ .

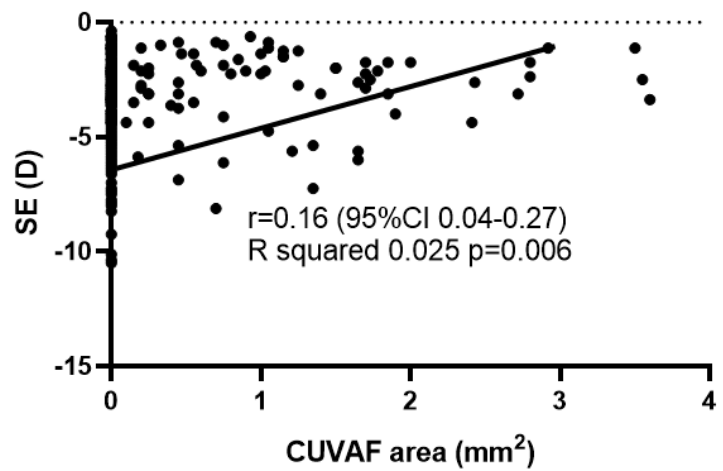

**Figure S2.** Correlation of Spherical Equivalent and CUVAF area in all the analyzed patients.
